1 Full title: Left-handed fighters are  
2 overrepresented and more successful in  
3 combat sports  
4

5 Short title: Left-handedness and fighting  
6 SUCCESS

7 Thomas Richardson<sup>1\*</sup> & R. Tucker Gilman<sup>1</sup>

8 <sup>1</sup> School of Earth and Environmental Sciences, University of Manchester,  
9 United Kingdom

10 \*corresponding author: [thomas.richardson@manchester.ac.uk](mailto:thomas.richardson@manchester.ac.uk)

# 11 Left-handed fighters are overrepresented and more 12 successful in combat sports

13

## 14 Abstract

15 Left-handedness is a costly, sexually dimorphic trait found at low frequencies in all human  
16 populations. How the handedness polymorphism is maintained is unclear. The fighting hypothesis  
17 argues that left-handed men have a negative frequency-dependent advantage in fighting giving  
18 them a selective advantage. In support of this, many studies have found that left-handed men are  
19 overrepresented in combat sports, but studies typically find no difference in fighting success  
20 between left and right-handed fighters. We studied over 9800 professional boxers and mixed  
21 martial arts fighters of varying abilities in three of the largest samples to test this hypothesis to date,  
22 finding robust evidence that left-handed fighters have greater fighting success. This held for both  
23 male and female fighters, and for both percentage of fights won and an objective measure of  
24 fighting ability. We replicated previous results showing the left-handed fighters are strongly  
25 overrepresented in professional combat sports, but left-handed fighters did not show greater  
26 variance in fighting ability, a hypothesis suggested in previous studies. Overall we find strong  
27 evidence consistent with the fighting hypothesis.

---

## 28 Introduction

29 Left-handedness is a cross-culturally universal, heritable phenotype in humans [1] that is thought to  
30 be associated with fitness costs ([2,3], reviewed in [4], but see [5]). Typically around 11% of the  
31 population is left-handed [6] and though exact numbers vary with culture [7], left-handers are  
32 always a minority. Since left-handedness is under direct negative selection, its persistence in  
33 humans is an evolutionary puzzle.

34

35 One explanation for the persistence of left-handedness is the fighting hypothesis [8]. This argues  
36 that the polymorphism in human handedness is maintained due to a negative frequency-dependent  
37 advantage that left-handedness confers to males in combat (see [9] for theoretical support, and [10]  
38 for a review of empirical evidence as well as alternatives). According to this theory, right-handed  
39 males often lack experience fighting rare left-handed males, while left-handed males accumulate  
40 plenty of experience fighting right-handed males, putting them at a selective advantage. Combined  
41 with the intrinsic fitness costs of left-handedness, this would explain the universal pattern of low but  
42 stable levels of left-handers in all studied populations. There is mounting evidence that intrasexual  
43 contest competition such as fighting has been a key component of sexual selection on human  
44 males [11]. Modern males may possess adaptations to assist them in fighting and assessing  
45 opponents' fighting ability [12]. Handedness could therefore be considered a sexually selected trait  
46 in males, and may be expressed in females as a by-product [9].

47

48 Consistent with the fighting hypothesis, there is a wealth of evidence that left-handers are  
49 overrepresented in combat sports. Sports are particularly relevant systems for testing theories  
50 based on intrasexual competition, as they are thought to have evolved culturally as a display for  
51 males to advertise fighting and competitive ability [13]. Overrepresentation of left-handers has  
52 been seen in boxing [14-16], mixed martial arts or MMA [17-20], wrestling [21], Judo [22], and  
53 Karate and Taekwondo [23]. Left-handers are also overrepresented in many other sports, though  
54 crucially only sports requiring direct interaction with an opponent [24,25]. As they are rare, left-  
55 handers may gain an advantage because their actions are more difficult to predict [26-28], perhaps  
56 due to attentional biases towards the right hand of an opponent [29]. If left-handed men are  
57 disproportionately successful in combat sports when they are rare, it is not unreasonable to  
58 assume they would also be successful in ancestral environments where physical violence and  
59 competition were likely much more common than today [11].

60

61 Studies of the fighting hypothesis in martial artists typically do not find that left-handed fighters are  
62 more likely to win fights (e.g., [17], but see [16]). However, previous studies have often used small

63 sample sizes (e.g. [14]) or only assessed the very best members of a particular sport (e.g., [16,  
64 21]). Any advantages are likely to be small as a large advantage would lead to an increase in the  
65 frequency of left-handed fighters until the advantage exactly offsets the costs of being left-handed,  
66 which may be small in populations with access to modern healthcare [2]. Thus, detecting the effect  
67 of left-handedness on fighting success may require very large sample sizes. Likewise, top fighters,  
68 by definition have little variance in fight success, making detecting relationships in these datasets  
69 difficult. Top fighters are also likely to have encountered enough left-handed opponents that any  
70 advantages due to unfamiliarity would be diminished. Evidence for whether left-handed fighters  
71 perform better than right-handed fighters is thus inconclusive. The present studies tested whether  
72 left-handed fighters are better than right-handed fighters in 3 large samples consisting of  
73 professional fighters at a variety of ability levels. In particular, one of our samples comprised the  
74 majority of boxers professionally active at the time of writing.

75

76 Previous studies also used win percentage records, number of wins, or ranking from a single  
77 tournament as proxies of fighting ability. These may fail to capture long term fighting performance,  
78 particularly for fighters with 0 losses, (which gives a win percentage of 1 regardless of the number  
79 of fights). These metrics also do not weight wins by quality of opponent, and fail to include how  
80 fighters beat their opponent. For example, winning a boxing match by having better judges' score  
81 after 10 rounds may indicate less physical dominance than a win by knockout in the first round. In  
82 our samples we excluded fighters who had few fights, and additionally compared left and right-  
83 handed boxers using their BoxRec score, a comprehensive measure of fighting ability that takes  
84 into account both the type of victory and the opponent quality (see supplementary materials for a  
85 description of how a BoxRec score is calculated).

86

87 The fighting hypothesis for the evolution of left-handedness is based on male-male contest  
88 competition, but there is no reason to expect the frequency-dependent advantage of left-  
89 handedness in combat to be confined to males. However, there have been few studies of the  
90 success of left-handed female fighters. To remedy this, one of our samples consisted exclusively of

91 female professional boxers and our sample of MMA fighters included women as well as men.  
92 Additionally, comparison of the left-hand advantage in male and female fighters allows us to  
93 investigate negative frequency-dependence. If there are fewer left-handed female fighters than  
94 male ones, the fighting hypothesis would predict left-handed female fighters would have a larger  
95 advantage.

96

97 Lastly, a previous study by Dochtermann et al. [19] demonstrated that left-handed MMA fighters  
98 show greater variance in probability of winning a fight than right-handed fighters. They argue that  
99 this is because the advantage left-handed fighters possess increases the probability that they will  
100 reach professional level compared to right-handers even if they are less skilled. We attempted to  
101 replicate this finding in our samples.

102

103 In summary, we investigated representation and fighting success of left-handers in 3 of the largest  
104 samples tested thus far, consisting of professional male and female boxers and MMA fighters of  
105 varying abilities. For boxers, we also tested the difference between left and right-handers in  
106 BoxRec scores, a holistic measure of fighting ability. Our study provides the most powerful test of  
107 the fighting hypothesis attempted to date.

108

## 109 Results

110 All statistics were run in R [31], and all data and analysis code is available on the open science  
111 foundation [insert link here]. For all samples, the number of fights left- and right-handed fighters  
112 had participated in, fighter ages, win percentages and BoxRec scores were all non-normally  
113 distributed, so nonparametric statistics were used throughout.

114

115 A Mann-Whitney U test showed that left-handed male boxers did not differ in age ( $p = 0.36$ ) from  
116 right-handed boxers. For female fighters, age was not analysed as some boxers were retired,

117 deceased or not currently active. Age was not available for the MMA fighters. Mann-Whitney U  
118 tests found no significant differences in number of fights between left- and right-handed fighters  
119 among male boxers ( $p = 0.80$ ), female boxers ( $p = 0.58$ ) or MMA fighters, though the difference  
120 approached significance in the last group ( $p = 0.054$ ). Additionally, t-tests showed that left- and  
121 right-handed MMA fighters did not differ in overall weight, height or arm length (also known as  
122 “reach”) (all  $p > 0.16$ ). This data was not available for boxers.

### 123 Are left-handers overrepresented among professional fighters?

124 To test whether left-handed fighters were overrepresented in our samples we ran three separate,  
125 one-tailed binomial tests against percentages of left-handers found in a large representative,  
126 western population [6]. We tested the percentage of left-handed male boxers against the  
127 percentage of left-handed men (12.6%) and female boxers against the percentage of left-handed  
128 women (9.9%) in the general population. The MMA sample included both male and female fighters,  
129 so was tested against the percentage of left-handed men, as this was the most conservative test of  
130 our hypothesis. Table 1 shows that left-handed fighters were significantly overrepresented in all  
131 three samples (all  $p \leq 0.002$ ).

132

**Table 1.** results of Binomial tests of % of left-handed fighters against % of left-handed people in the general population

| Sample        | % left-handed fighters in sample | % left-handers in general population | p-value  |
|---------------|----------------------------------|--------------------------------------|----------|
| Male boxers   | 17.3                             | 12.6                                 | < 0.0001 |
| Female boxers | 12.6                             | 9.9                                  | = 0.002  |
| MMA fighters  | 18.7                             | 12.6                                 | < 0.0001 |

### 133 Do left-handed fighters possess greater fighting ability than right-handed 134 fighters?

135 We compared the fighting success of left- and right-handed fighters with one-tailed Mann-Whitney  
136 U tests. Each of the 3 samples was compared separately by win percentages, and the samples of  
137 male and female boxers were also compared by BoxRec scores. We calculated the measure of  
138 stochastic superiority [32,33] as an effect size for each comparison. The measure of stochastic

139 superiority, is the probability that a randomly selected left-handed fighter would have a higher win  
140 percentage/BoxRec score than a randomly selected right-handed fighter.

141

142 Among male boxers, the probability that a randomly selected left-handed fighter would have a  
143 higher BoxRec score than a randomly selected right-handed fighter was 53.7%, which a Mann-  
144 Whitney test showed was significant ( $p < 0.0001$ ). The measure of stochastic superiority for win  
145 percentage was 52.5%, which was also significant ( $p = 0.004$ ). Thus left-handed male boxers have  
146 significantly higher BoxRec scores and win percentages than right-handed male boxers.

147

148 Among female boxers, the probability that randomly selected left-hander showed a higher BoxRec  
149 score was 55.2%, which a Mann-Whitney test showed was significant ( $p = 0.019$ ). The measure of  
150 stochastic superiority for win percentage was 54.0%, which was not statistically significant  
151 ( $p = 0.057$ ). Thus left-handed female boxers showed significantly higher BoxRec scores but not win  
152 percentages.

153

154 Among MMA fighters, the probability that a randomly sampled left-handed fighter showed a higher  
155 win percentage than a randomly selected right-handed fighter was 53.3%, which was significant  
156 ( $p = 0.019$ ). Thus left-handed MMA fighters showed significantly higher win percentages than right-  
157 handed MMA fighters.

158

159 **FIGURE 1 HERE**

160 *Figure 1: The probability that a randomly selected left-hander showed a higher (A) win percentage and (B)*  
161 *BoxRec score than a randomly selected right-hander. Boxes indicate 50% and whiskers indicate 90%*  
162 *bootstrapped confidence intervals (5000 samples).*

163 Do left-handed fighters show greater variance than right-handed fighters?

164 We compared the variance in BoxRec scores and win percentages among left- and right-handers  
165 by bootstrapping differences in variance (10,000 samples), with bias correction and acceleration  
166 following [34] to obtain robust p-values. All p-values are one-tailed. Left-handed male boxers  
167 showed higher variance in BoxRec scores ( $p = 0.0004$ ) but not in win percentages ( $p = 0.9468$ ).  
168 Left-handed female fighters did not differ from right-handed female fighters in the variance of their  
169 BoxRec scores ( $p = 0.4902$ ) or win percentages ( $p = 0.7595$ ). Likewise left-handed MMA fighters  
170 did not differ from right-handed MMA fighters in the variance of their win percentages ( $p = 0.4601$ ).

171 Does the left-hand advantage show negative frequency-dependence?

172 The prevalence of left-handedness in female boxers was much lower than in male boxers (17.3%  
173 vs 12.6%), while the magnitude of left-hand advantage in the BoxRec scores of female fighters  
174 was higher (55.% vs 53.7%). If the advantage left-handed fighters have is negative frequency-  
175 dependent, then we might expect left-handed female boxers to have a relatively larger advantage  
176 than left-handed male boxers. To investigate this, we compared the measures of stochastic  
177 superiority in the BoxRec scores of male and female boxers, and we bootstrapped a confidence  
178 interval around the difference (10,000 samples). The difference in the advantage of left-handed  
179 female and male boxers was not significantly different from 0 (bias corrected, accelerated  $p$ -value  
180 = 0.29). Thus, we have no evidence that female boxers experience a greater left-hand advantage  
181 than male boxers.

182

## 183 Discussion

184 Across three samples, we found that left-handed boxers and MMA fighters are both  
185 overrepresented in their respective sports and are more successful fighters. In male boxers, these  
186 effects held for both win percentages and BoxRec scores, where BoxRec scores are a more  
187 comprehensive measure of boxing ability. In female boxers we found that left-handed fighters  
188 showed higher BoxRec scores but not higher win percentages. Our results are consistent with the



189 fighting hypothesis that left-handedness is maintained in populations because it provides a  
190 advantage in contest competition.

191

192 Our finding that left-handed fighters have better records than right-handed fighters in both male  
193 boxers and MMA fighters contrasts to most previous studies (e.g. [15,17,18], but see [16]). Two  
194 factors may have played a role. Firstly, the effect is small and may only be detectable in large  
195 samples such as ours. Second, it may not be detectable in datasets with low variance in fighting  
196 ability, such as when studies use samples of only elite fighters (e.g., [15]). The fact that we find  
197 similar results in both win percentages and BoxRec scores, which are a more complete measure of  
198 boxing ability, lead us to believe our results are robust.

199

200 Our positive finding for MMA fighters may be surprising, as a similar study [18] did not find a  
201 significant advantage of left-handedness in a sample approximately 75% of the size of ours. The  
202 study collected data from the same website we did ~6 years earlier, so its data set likely overlaps  
203 with ours. The different results may be due to the choice of analyses, or to the fact that the study  
204 did not exclude fighters with few fights as we did. It is noteworthy that in [18], left-handed fighters  
205 had a non-significantly higher win percentage, so the trend reported is consistent with our results.

206

207 We found that left-handed female boxers showed better BoxRec scores than right-handed female  
208 boxers. As there were fewer left-handed fighters in the female sample than the male sample (12.6%  
209 to male's 17.3%), we tested whether the left-hand advantage seen in female fighters was higher  
210 than that of male fighters. Left-handed female fighters being less numerous and having greater  
211 success than their male counterparts would be consistent with the fighting hypothesis, in that it  
212 suggests a negative frequency-dependent advantage. However we did not find this. That the left-  
213 handed advantage in combat is negative frequency-dependent remains to be convincingly  
214 demonstrated, and is a crucial topic of future research. This might be investigated by comparing  
215 fighting leagues with varying levels of left-handers, or by testing whether increased contact with  
216 left-handed opponents over a fighter's career increases his/her probability of winning.

217

218 Unlike Dochtermann et al. [19], overall we found little evidence that left-handed fighters showed  
219 higher variance in fighting ability. Across all samples, only male left-handed boxers showed  
220 significantly higher variance, and then only in BoxRec scores. The difference in results could be  
221 attributed to the fact that Dochtermann et al. tested variance in the probability of a fighter to win a  
222 single given fight, whereas we examined variance in fighting success as measured by a fighter's  
223 record over their career thus far. It is possible that coaches (many of whom may suspect the  
224 existence of a left-handed advantage) or the left-handed fighters themselves adapt their training to  
225 compensate for their fighter's lower skills. However we warn that cross sectional data, such as  
226 ours and that of Dochtermann et al., are limited in their ability to answer this question. Longitudinal  
227 work that tracks whether left-handed amateurs are more likely to reach professional level  
228 regardless of initial skill would be valuable, and shed more light on this interesting hypothesis.

## 229 Conclusion

230 In conclusion, we present strong evidence that left-handed fighters show greater fighting success,  
231 consistent with the fighting hypothesis. Our study also provides further evidence that left-handed  
232 fighters are overrepresented in combat sports. We demonstrate these effects in 3 of the largest  
233 samples to test the hypothesis to date, using both male and female fighters, and using multiple  
234 measures of fighting competence. Future research linking fighting stance to fitness costs  
235 associated with handedness, as well as more direct work investigating the negative frequency-  
236 dependent nature of the left-hand advantage, is required.

## 237 Samples

238 Our first sample comprised every male professional boxer in the world listed as 'active' on  
239 [www.boxrec.com](http://www.boxrec.com) at the time of writing (January 2019). BoxRec.com is a community-run boxing  
240 website that aims to document the careers of every professional boxer to have ever taken part in a  
241 recorded match. Boxers are listed as active if they have fought in an officially licensed bout in the  
242 past 12 months. Our second sample comprised all professional female boxers listed on

243 [www.boxrec.com](http://www.boxrec.com) for which stance data was available. For the female sample we included both  
244 active and retired boxers, as this ensured a large sample. Finally our third sample comprised all  
245 the MMA fighters listed on fightmetric.com at the time of writing. Fightmetric.com is a  
246 comprehensive, respected MMA database that is the official statistics provider to the Ultimate  
247 Fighting Championship (UFC).

248

249 For boxers we included every male boxer with a BoxRec score of 3 or higher. This was because  
250 boxers with scores lower than this (the minimum score is 0) were typically fighters who had very  
251 few professional fights, or fighters who had suffered a very high number of losses relative to their  
252 number of wins. These latter fighters, typically called “tomato cans” in boxing slang, are  
253 uncompetitive fighters who take matches with opponents they have little chance of beating simply  
254 to earn money. They are often matched against young up-and-coming fighters in order to gain the  
255 fighter more wins on their record. For these reasons their win percentage may not reflect their  
256 fighting ability, and as such they were excluded. For the same reasons, we also removed boxers  
257 and MMA fighters with a win percentage of 0. We also excluded fighters with fewer than 5 fights as  
258 their fight record is too preliminary to reflect their fighting ability.

259

260 The final samples consisted of 6579 male boxers, (5442 right-handed and 1137 left-handed), 1178  
261 female boxers, (1030 right-handed and 148 left-handed fighters) and  
262 2114 MMA fighters (1718 right-handed and 396 left-handed fighters).

## 263 Acknowledgements

264 We thank Rebecca Lewis and the other members of the Gilman lab for comments on the draft of  
265 this paper as well as the community of BoxRec.com and James Carr for insight into the world of  
266 boxing.

267

## 268 References

269

- 270 1. Medland SE, Duffy DL, Wright MJ, Geffen GM, Hay DA, Levy F, Van-Beijsterveldt CE,  
271 Willemsen G, Townsend GC, White V, Hewitt AW. Genetic influences on handedness: data  
272 from 25,732 Australian and Dutch twin families. *Neuropsychologia*. 2009 Jan 1;47(2):330-7
- 273 2. Coren S, Halpern DF. Left-handedness: a marker for decreased survival fitness. *Psychological*  
274 *bulletin*. 1991 Jan;109(1):90
- 275 3. Dragovic M, Hammond G. Handedness in schizophrenia: a quantitative review of evidence.  
276 *Acta Psychiatrica Scandinavica*. 2005 Jun;111(6):410-9
- 277 4. Llaurens V, Raymond M, Faurie C. Why are some people left-handed? An evolutionary  
278 perspective. *Philosophical Transactions of the Royal Society B: Biological Sciences*. 2008 Dec  
279 5;364(1519):881-94
- 280 5. Zickert N, Geuze RH, van der Feen FE, Groothuis TG. Fitness costs and benefits associated  
281 with hand preference in humans: A large internet study in a Dutch sample. *Evolution and*  
282 *Human Behavior*. 2018 Mar 1;39(2):235-48
- 283 6. Gilbert AN, Wysocki CJ. Hand preference and age in the United States. *Neuropsychologia*.  
284 1992 Jul 1;30(7):601-8
- 285 7. Raymond M, Pontier D. Is there geographical variation in human handedness?. *Laterality:*  
286 *Asymmetries of Body, Brain and Cognition*. 2004 Jan 1;9(1):35-51
- 287 8. Raymond M, Pontier D, Dufour AB, Møller AP. Frequency-dependent maintenance of left  
288 handedness in humans. *Proc. R. Soc. Lond. B*. 1996 Dec 22;263(1377):1627-33
- 289 9. Billiard S, Faurie C, Raymond M. Maintenance of handedness polymorphism in humans: a  
290 frequency-dependent selection model. *Journal of Theoretical Biology*. 2005 Jul 7;235(1):85-93
- 291 10. Groothuis TG, McManus IC, Schaafsma SM, Geuze RH. The fighting hypothesis in combat:  
292 how well does the fighting hypothesis explain human left-handed minorities?. *Annals of the*  
293 *New York Academy of Sciences*. 2013 Jun 1;1288(1):100-9
- 294 11. Puts DA. Beauty and the beast: Mechanisms of sexual selection in humans. *Evolution and*  
295 *Human Behavior*. 2010 May 1;31(3):157-75

- 296 12. Třebický V, Stirrat M, Havlíček J. Fighting Assessment. In: T. K. Shackelford, V. A. Weekes-  
297 Shackelford (eds.), *Encyclopedia of Evolutionary Psychological Science* Switzerland: Springer  
298 Nature p. 1-11
- 299 13. Deaner RO, Balish SM, Lombardo MP. Sex differences in sports interest and motivation: An  
300 evolutionary perspective. *Evolutionary Behavioral Sciences*. 2016 Apr;10(2):73
- 301 14. Gursoy R. Effects of left-or right-hand preference on the success of boxers in Turkey. *British*  
302 *Journal of Sports Medicine*. 2009 Feb 1;43(2):142-4
- 303 15. Sorokowski P, Sabiniewicz A, Waciewicz S. The influence of the boxing stance on performance  
304 in professional boxers. *AnthropologicAI review*. 2014 Dec 1;77(3):347-53
- 305 16. Loffing F, Hagemann N. Pushing through evolution? Incidence and fight records of left-oriented  
306 fighters in professional boxing history. *Laterality: Asymmetries of Body, Brain and []Cognition*.  
307 2015 May 4;20(3):270-86
- 308 17. Pollet TV, Stulp G, Groothuis TG. Born to win? Testing the fighting hypothesis in realistic fights:  
309 left-handedness in the Ultimate Fighting Championship. *Animal behaviour*. 2013 Oct  
310 1;86(4):839-43
- 311 18. Baker J, Schorer J. The Southpaw Advantage?-Lateral Preference in Mixed Martial Arts. *Plos*  
312 *One*. 2013 Nov 19;8(11):e79793
- 313 19. Dochtermann NA, Gienger CM, Zappettini S. Born to win? Maybe, but perhaps only against  
314 inferior competition. *Animal Behaviour*. 2014(96):e1-3
- 315 20. Pollet TV, Riegman BR. Opponent left-handedness does not affect fight outcomes for Ultimate  
316 Fighting Championship hall of famers. *Frontiers in psychology*. 2014 Apr 30;5:375
- 317 21. Ziyagil MA, Gursoy R, Dane Ş, Yuksel R. Left-handed wrestlers are more successful.  
318 *Perceptual and motor skills*. 2010 Aug;111(1):65-70
- 319 22. Tirp J, Baker J, Weigelt M, Schorer J. Combat stance in judo—Laterality differences between  
320 and within competition levels. *International Journal of Performance Analysis in Sport*. 2014 Apr  
321 1;14(1):217-24
- 322 23. Cingoz YE, Gursoy R, Ozan M, Hazar K, Dalli M. Research on the Relation between Hand  
323 Preference and Success in Karate and Taekwondo Sports with Regards to Gender. *Advances*  
324 *in Physical Education*. 2018 Aug 1;8(03):308

- 325 24. Aggleton JP, Wood CJ. Is there a left-handed advantage in "ballistic" sports?. *International*  
326 *Journal of Sport Psychology*. 1990 Jan
- 327 25. Grouios G, Tsorbatzoudis H, Alexandris K, Barkoukis V. Do left-handed competitors have an  
328 innate superiority in sports?. *Perceptual and motor skills*. 2000 Jun;90(3\_suppl):1273-82
- 329 26. Hagemann N. The advantage of being left-handed in interactive sports. *Attention, Perception, &*  
330 *Psychophysics*. 2009 Oct 1;71(7):1641-8
- 331 27. Loffing F, Schorer J, Hagemann N, Baker J. On the advantage of being left-handed in volleyball:  
332 further evidence of the specificity of skilled visual perception. *Attention, Perception, &*  
333 *Psychophysics*. 2012 Feb 1;74(2):446-53
- 334 28. Loffing F, Hagemann N, Schorer J, Baker J. Skilled players' and novices' difficulty anticipating  
335 left-vs. right-handed opponents' action intentions varies across different points in time. *Human*  
336 *movement science*. 2015 Apr 1;40:410-21
- 337 29. Marzoli D, Lucafò C, Pagliara A, Cappuccio R, Brancucci A, Tommasi L. Both right-and left-  
338 handers show a bias to attend others' right arm. *Experimental brain research*. 2015 Feb  
339 1;233(2):415-24
- 340 30. Loffing F, Hagemann N. Pushing through evolution? Incidence and fight records of left-oriented  
341 fighters in professional boxing history. *Laterality: Asymmetries of Body, Brain and Cognition*.  
342 2015 May 4;20(3):270-86
- 343 31. Team RC. R: A language and environment for statistical computing
- 344 32. McGraw KO, Wong SP. A common language effect size statistic. *Psychological bulletin*. 1992  
345 Mar;111(2):361
- 346 33. Vargha A, Delaney HD. A critique and improvement of the CL common language effect size  
347 statistics of McGraw and Wong. *Journal of Educational and Behavioral Statistics*. 2000  
348 Jun;25(2):101-32
- 349 34. DiCiccio TJ, Efron B. Bootstrap confidence intervals. *Statistical science*. 1996 Aug 1:189-212  
350  
351  
352

**A**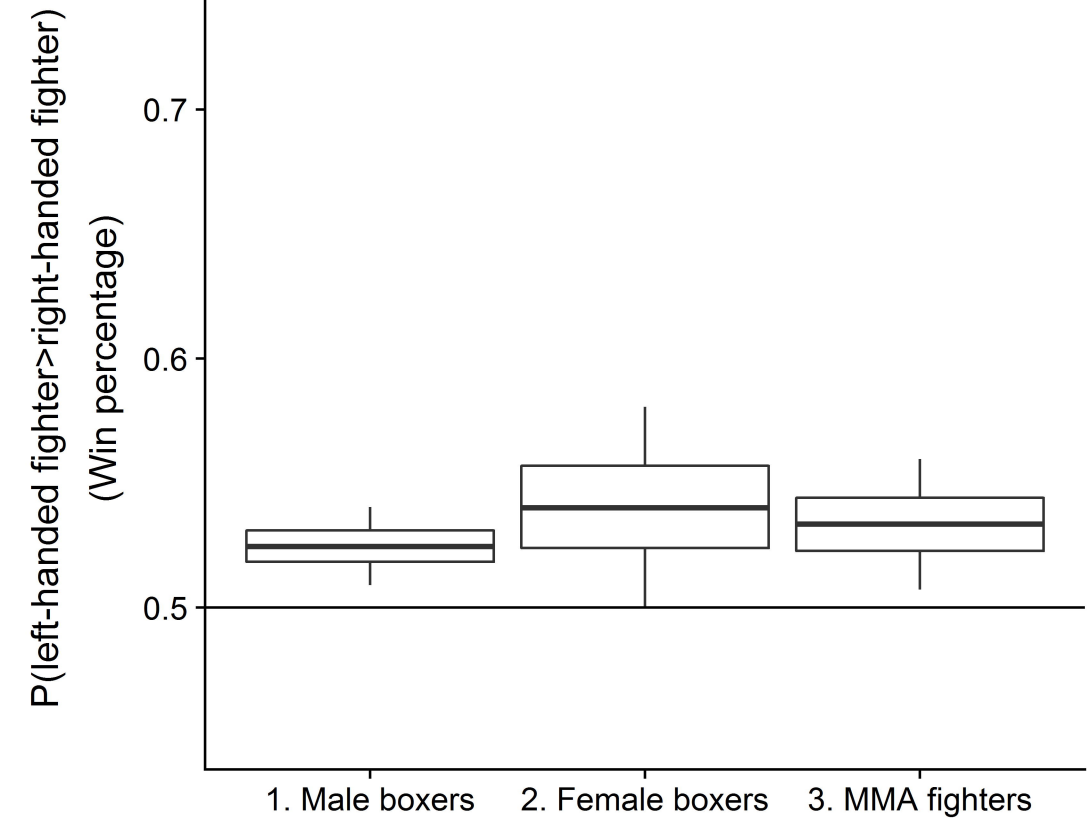**B**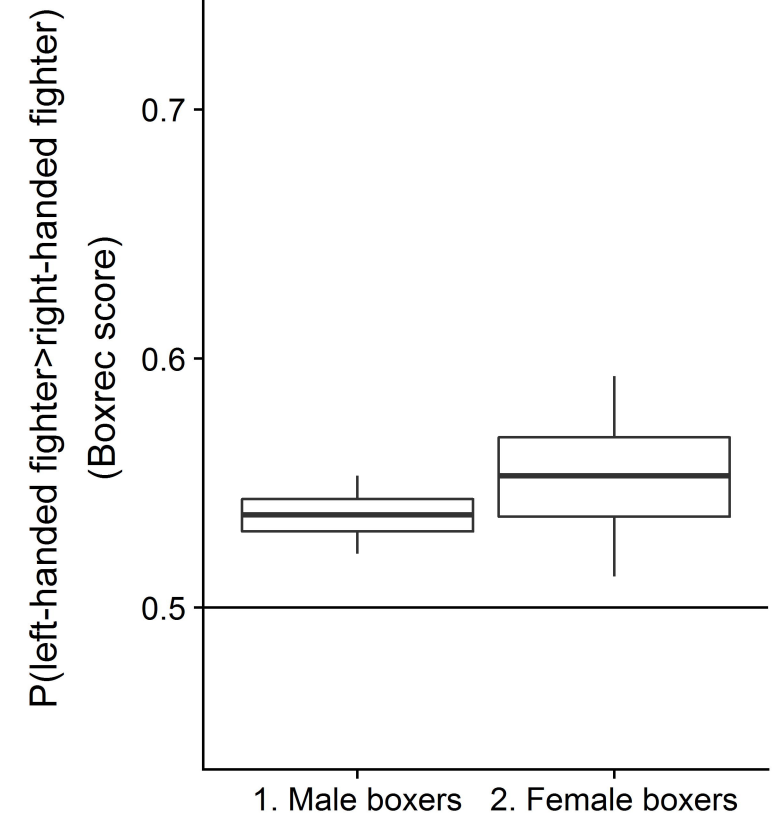

Source: https://www.biorxiv.org/content/10.1101/555912v2.full.pdf
